# Supplementary material
Source: publisher figshare collection journal article supplement (https://gsajournals.figshare.com/ndownloader/files/18009629)
Supplement: Supplementary file 1 [file 18009629]

## Sheet: Sheet1
Figure S1. The average value of the flowering traits in wild-type (WT) and mutant (MT) siblings of the F1 hybrids between Oy1-N1989/+:B73 (as a pollen-parent) with respective IBM-RILs.
IBM_ID	WT_DTA	WT_DTS	WT_ASI	MT_DTA	MT_DTS	MT_ASI	Ratio_DTA	Ratio_DTS
MO001	65	66	-1	74	74	0	1.14	1.12
MO003	62	65	-3	72	72	0	1.16	1.11
MO007	61	62	-1	73	72	1	1.2	1.16
MO008	62	64	-2	67	67	0	1.08	1.05
MO010	61	62	-1	68	67	1	1.11	1.08
MO013	64	65	-1	69	69	0	1.08	1.06
MO014	59	60	-1	75	75	0	1.27	1.25
MO016	64	65	-1	76	76	0	1.19	1.17
MO017	64	65	-1	69	68	1	1.08	1.05
MO018	62	64	-2	67	67	0	1.08	1.05
MO019	68	68	0	70	69	1	1.03	1.01
MO021	59	61	-2	76	76	0	1.29	1.25
MO022	67	67	0	72	70	2	1.07	1.04
MO023	60	61	-1	79	77	2	1.32	1.26
MO024	63	65	-2	69	67	2	1.1	1.03
MO025	60	61	-1	76	76	0	1.27	1.25
MO028	60	61	-1	76	76	0	1.27	1.25
MO029	65	66	-1	70	70	0	1.08	1.06
MO031	65	65	0	79	77	2	1.22	1.18
MO032	61	64	-3	74	74	0	1.21	1.16
MO033	62	65	-3	72	72	0	1.16	1.11
MO036	61	62	-1	74	73	1	1.21	1.18
MO039	60	62	-2	73	73	0	1.22	1.18
MO040	66	66	0	72	70	2	1.09	1.06
MO042	63	65	-2	68	68	0	1.08	1.05
MO044	59	59	0	75	75	0	1.27	1.27
M0045	60	62	-2	69	69	0	1.15	1.11
MO047	66	67	-1	76	75	1	1.15	1.12
MO048	66	67	-1	72	72	0	1.09	1.07
MO051	61	62	-1	75	75	0	1.23	1.21
MO052	61	61	0	67	67	0	1.1	1.1
MO054	65	66	-1	72	70	2	1.11	1.06
MO055	63	64	-1	65	65	0	1.03	1.02
MO056	64	65	-1	69	68	1	1.08	1.05
MO057	65	67	-2	68	68	0	1.05	1.01
MO060	62	63	-1	76	76	0	1.23	1.21
MO061	62	63	-1	66	68	-2	1.06	1.08
MO062	65	66	-1	69	68	1	1.06	1.03
MO063	60	62	-2	66	66	0	1.1	1.06
MO066	63	65	-2	69	70	-1	1.1	1.08
MO067	64	65	-1	68	68	0	1.06	1.05
MO074	63	64	-1	75	75	0	1.19	1.17
MO076	61	62	-1	74	74	0	1.21	1.19
MO077	66	66	0	78	77	1	1.18	1.17
MO079	64	65	-1	71	71	0	1.11	1.09
MO080	60	62	-2	70	70	0	1.17	1.13
MO081	59	60	-1	75	75	0	1.27	1.25
MO082	61	66	-5	80	80	0	1.31	1.21
MO083	61	63	-2	66	67	-1	1.08	1.06
MO085	62	64	-2	75	76	-1	1.21	1.19
MO086	61	63	-2	69	69	0	1.13	1.1
MO088	65	64	1	69	69	0	1.06	1.08
MO092	58	59	-1	63	64	-1	1.09	1.08
MO093	63	65	-2	72	72	0	1.14	1.11
MO097	58	60	-2	72	72	0	1.24	1.2
MO098	65	66	-1	73	73	0	1.12	1.11
MO099	67	68	-1	77	78	-1	1.15	1.15
MO101	61	62	-1	69	69	0	1.13	1.11
MO106	65	66	-1	72	71	1	1.11	1.08
MO109	66	66	0	71	69	2	1.08	1.05
MO110	62	62	0	75	75	0	1.21	1.21
MO113	63	64	-1	71	69	2	1.13	1.08
MO114	59	62	-3	69	72	-3	1.17	1.16
MO116	62	63	-1	71	72	-1	1.15	1.14
MO118	61	62	-1	67	68	-1	1.1	1.1
MO119	62	64	-2	75	74	1	1.21	1.16
MO121	60	62	-2	69	69	0	1.15	1.11
MO124	62	64	-2	65	66	-1	1.05	1.03
MO125	59	60	-1	68	69	-1	1.15	1.15
MO127	71	70	1	72	72	0	1.01	1.03
MO129	64	66	-2	79	79	0	1.23	1.2
MO130	67	69	-2	73	73	0	1.09	1.06
MO131	61	62	-1	68	69	-1	1.11	1.11
MO133	60	61	-1	75	75	0	1.25	1.23
MO134	64	65	-1	69	69	0	1.08	1.06
MO138	62	64	-2	66	66	0	1.06	1.03
MO141	74	75	-1	82	81	1	1.11	1.08
MO142	61	62	-1	67	67	0	1.1	1.08
MO146	65	66	-1	68	69	-1	1.05	1.05
MO147	60	62	-2	75	75	0	1.25	1.21
MO153	66	66	0	70	69	1	1.06	1.05
MO154	59	60	-1	72	72	0	1.22	1.2
MO156	61	63	-2	66	67	-1	1.08	1.06
MO157	62	64	-2	71	71	0	1.15	1.11
MO159	66	67	-1	76	76	0	1.15	1.13
MO160	65	66	-1	75	76	-1	1.15	1.15
MO161	64	66	-2	77	77	0	1.2	1.17
M0162	64	65	-1	77	77	0	1.2	1.18
MO165	64	65	-1	77	78	-1	1.2	1.2
MO168	62	65	-3	75	75	0	1.21	1.15
MO169	61	61	0	67	66	1	1.1	1.08
MO170	66	66	0	72	71	1	1.09	1.08
MO171	64	65	-1	68	67	1	1.06	1.03
MO174	61	62	-1	74	74	0	1.21	1.19
MO176	62	64	-2	76	77	-1	1.23	1.2
MO177	65	66	-1	79	78	1	1.22	1.18
MO178	59	61	-2	71	70	1	1.2	1.15
MO180	62	65	-3	66	66	0	1.06	1.02
MO181	59	61	-2	67	67	0	1.14	1.1
MO182	61	63	-2	73	73	0	1.2	1.16
MO183	61	64	-3	71	70	1	1.16	1.09
MO184	63	64	-1	76	76	0	1.21	1.19
MO185	63	65	-2	69	70	-1	1.1	1.08
MO186	70	69	1	79	78	1	1.13	1.13
MO189	64	65	-1	69	68	1	1.08	1.05
MO191	61	64	-3	75	75	0	1.23	1.17
MO192	61	62	-1	82	81	1	1.34	1.31
MO194	62	64	-2	69	69	0	1.11	1.08
MO195	65	66	-1	69	69	0	1.06	1.05
MO196	62	62	0	66	68	-2	1.06	1.1
MO197	62	64	-2	70	70	0	1.13	1.09
MO198	66	66	0	71	69	2	1.08	1.05
MO199	63	65	-2	70	70	0	1.11	1.08
MO200	62	64	-2	69	69	0	1.11	1.08
MO201	60	61	-1	73	73	0	1.22	1.2
MO204	62	63	-1	77	77	0	1.24	1.22
MO205	59	60	-1	70	69	1	1.19	1.15
MO206	59	60	-1	66	66	0	1.12	1.1
MO208	65	66	-1	71	70	1	1.09	1.06
MO209	61	61	0	65	65	0	1.07	1.07
MO214	60	61	-1	69	71	-2	1.15	1.16
MO215	60	60	0	74	74	0	1.23	1.23
MO216	60	61	-1	67	68	-1	1.12	1.11
MO218	61	62	-1	77	77	0	1.26	1.24
MO219	61	63	-2	67	67	0	1.1	1.06
MO220	65	66	-1	72	72	0	1.11	1.09
MO222	63	64	-1	66	67	-1	1.05	1.05
MO223	61	62	-1	68	67	1	1.11	1.08
MO224	60	61	-1	66	66	0	1.1	1.08
MO225	65	67	-2	79	78	1	1.22	1.16
MO228	64	65	-1	75	75	0	1.17	1.15
MO229	60	62	-2	67	68	-1	1.12	1.1
MO232	66	67	-1	71	71	0	1.08	1.06
MO233	64	65	-1	70	71	-1	1.09	1.09
MO237	61	63	-2	76	76	0	1.25	1.21
MO240	61	62	-1	74	74	0	1.21	1.19
MO241	66	66	0	69	71	-2	1.05	1.08
MO244	61	61	0	74	74	0	1.21	1.21
MO248	61	62	-1	69	69	0	1.13	1.11
MO250	62	62	0	78	77	1	1.26	1.24
MO253	59	60	-1	81	79	2	1.37	1.32
MO255	65	66	-1	76	77	-1	1.17	1.17
MO256	62	65	-3	80	79	1	1.29	1.22
MO258	60	61	-1	75	75	0	1.25	1.23
MO262	59	60	-1	75	75	0	1.27	1.25
MO263	62	64	-2	77	77	0	1.24	1.2
MO264	62	67	-5	76	76	0	1.23	1.13
MO265	60	61	-1	69	68	1	1.15	1.11
MO266	61	62	-1	68	68	0	1.11	1.1
MO267	61	63	-2	69	70	-1	1.13	1.11
MO269	61	62	-1	68	68	0	1.11	1.1
MO270	65	66	-1	70	68	2	1.08	1.03
MO271	62	64	-2	66	68	-2	1.06	1.06
MO272	65	66	-1	74	74	0	1.14	1.12
MO274	61	63	-2	68	69	-1	1.11	1.1
MO275	66	67	-1	78	79	-1	1.18	1.18
MO276	62	62	0	71	70	1	1.15	1.13
MO277	62	64	-2	69	69	0	1.11	1.08
MO279	66	68	-2	81	80	1	1.23	1.18
MO280	65	65	0	68	68	0	1.05	1.05
MO282	61	62	-1	75	75	0	1.23	1.21
MO286	61	65	-4	77	76	1	1.26	1.17
MO287	65	66	-1	80	79	1	1.23	1.2
MO292	58	59	-1	73	73	0	1.26	1.24
MO295	62	62	0	68	66	2	1.1	1.06
MO296	64	65	-1	74	75	-1	1.16	1.15
MO297	64	65	-1	71	70	1	1.11	1.08
MO298	63	64	-1	69	68	1	1.1	1.06
MO300	69	69	0	77	77	0	1.12	1.12
MO301	63	64	-1	72	73	-1	1.14	1.14
MO304	64	65	-1	76	76	0	1.19	1.17
MO305	62	65	-3	69	69	0	1.11	1.06
MO307	70	69	1	77	75	2	1.1	1.09
MO311	64	64	0	70	68	2	1.09	1.06
MO313	61	62	-1	75	75	0	1.23	1.21
MO314	65	64	1	69	70	-1	1.06	1.09
MO318	62	65	-3	76	76	0	1.23	1.17
MO321	63	64	-1	69	69	0	1.1	1.08
MO322	67	68	-1	69	68	1	1.03	1
MO325	64	65	-1	71	69	2	1.11	1.06
MO326	65	66	-1	75	74	1	1.15	1.12
MO328	63	64	-1	76	77	-1	1.21	1.2
MO331	64	66	-2	71	71	0	1.11	1.08
MO334	58	60	-2	68	66	2	1.17	1.1
MO335	62	64	-2	71	70	1	1.15	1.09
MO337	62	63	-1	68	68	0	1.1	1.08
MO340	62	63	-1	71	71	0	1.15	1.13
MO341	61	62	-1	78	76	2	1.28	1.23
MO344	65	66	-1	76	75	1	1.17	1.14
MO345	63	64	-1	72	71	1	1.14	1.11
MO346	65	66	-1	70	69	1	1.08	1.05
MO347	59	62	-3	76	75	1	1.29	1.21
MO349	62	64	-2	75	75	0	1.21	1.17
MO351	59	60	-1	66	66	0	1.12	1.1
MO352	60	62	-2	67	67	0	1.12	1.08
MO353	67	69	-2	69	69	0	1.03	1
MO354	60	61	-1	76	75	1	1.27	1.23
MO355	59	60	-1	67	68	-1	1.14	1.13
MO356	63	64	-1	73	74	-1	1.16	1.16
MO357	62	62	0	68	69	-1	1.1	1.11
MO358	59	60	-1	68	68	0	1.15	1.13
MO360	58	60	-2	67	67	0	1.16	1.12
MO361	62	63	-1	74	74	0	1.19	1.17
MO362	63	64	-1	69	68	1	1.1	1.06
MO364	61	63	-2	70	69	1	1.15	1.1
MO368	61	62	-1	67	67	0	1.1	1.08
MO369	61	63	-2	67	67	0	1.1	1.06
MO372	63	65	-2	77	76	1	1.22	1.17
MO373	67	67	0	81	80	1	1.21	1.19
MO378	64	65	-1	68	68	0	1.06	1.05
MO379	60	61	-1	77	78	-1	1.28	1.28
MO380	59	61	-2	67	67	0	1.14	1.1
MO381	59	60	-1	66	67	-1	1.12	1.12
MO382	61	62	-1	69	70	-1	1.13	1.13
MO383	64	66	-2	77	77	0	1.2	1.17
MO384	63	65	-2	78	77	1	1.24	1.18
